# Supplementary material for: Characterization of Pt-doping effects on nanoparticle emission: a theoretical look at Au24Pt(SH)18 and Au24Pt(SC3H7)18
Source: Royal Society of Chemistry journal article supplement (doi:10.1039/d2fd00110a), 2022-06-16
Supplement: d2fd00110a1.pdf [file d2fd00110a1.pdf]

## Characterization of Pt-doping effects on nanoparticle emission: A theoretical look at $\text{Au}_{24}\text{Pt}(\text{SH})_{18}$ and $\text{Au}_{24}\text{Pt}(\text{SC}_3\text{H}_7)_{18}$

Shana Havenridge, K. L. Dimuthu M. Weerawardene and Christine M. Aikens\*

Department of Chemistry, Kansas State University, Manhattan, Kansas 66506, United States

### Supporting Information

**Table S1.** Relative energies of  $\text{Au}_{24}\text{Pt}(\text{SC}_3\text{H}_7)_{18}$  isomers for different locations of the dopant. One BP86/TZP calculation was performed to check the relative energies in each location (center, outer shell of the core, staple).

| Dopant Position |                    | Relative Energy (eV) |          |
|-----------------|--------------------|----------------------|----------|
| Atom #          | Location           | BP86/DZ              | BP86/TZP |
| P1              | Center             | 0.00                 | 0.00     |
| P4              | Core (Outer Shell) | 0.38                 | --       |
| P5              | Core (Outer Shell) | 0.26                 | 0.03     |
| P7              | Core (Outer Shell) | 0.53                 | --       |
| P14             | Core (Outer Shell) | 0.63                 | --       |
| P15             | Core (Outer Shell) | 0.53                 | --       |
| P22             | Core (Outer Shell) | 0.28                 | --       |
| P24             | Staple Motif       | 0.69                 | 0.30     |

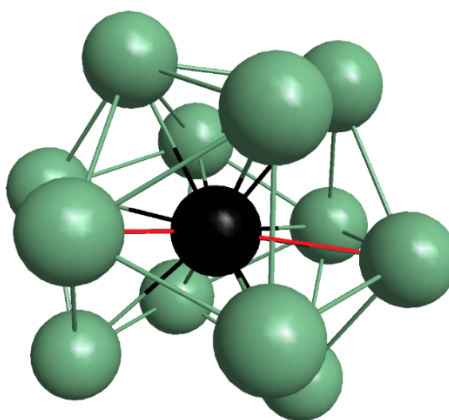

**Figure S1.** Illustration of the flattened oblate  $\text{Au}_{12}\text{Pt}$  core as it appears in the optimized BP86/DZ ground state of  $\text{Au}_{24}\text{Pt}(\text{SC}_3\text{H}_7)_{18}$ . The two bonds that are  $\sim 0.11 \text{ \AA}$  larger than the rest of the Au core – Pt center bonds are colored in red.

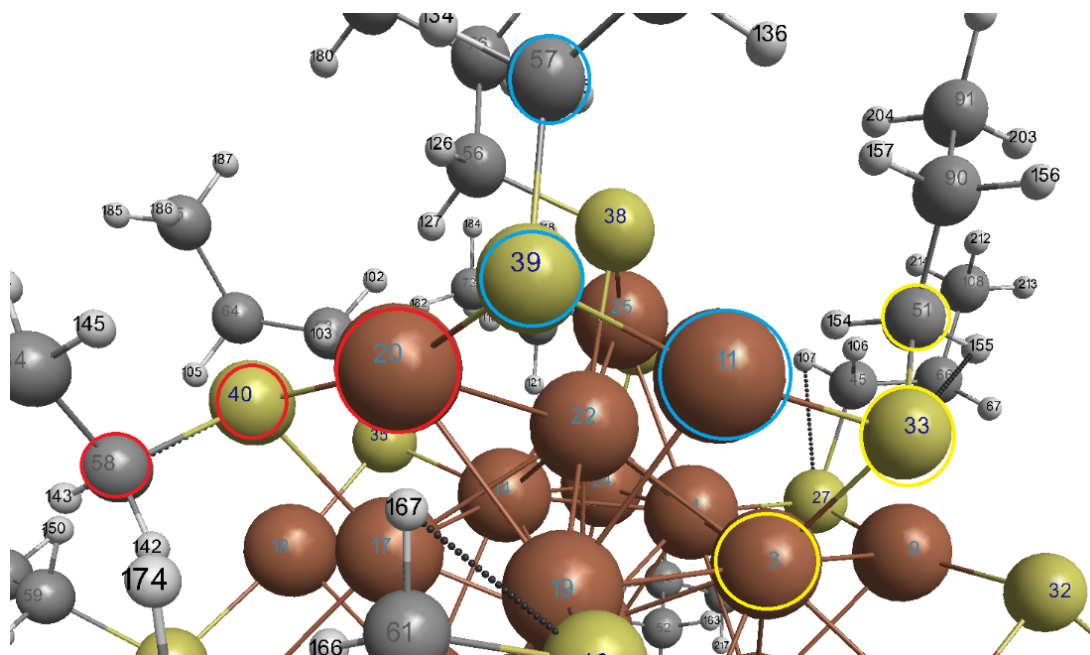

**Figure S2.** Illustration of the Au-S-C angles inside one  $\text{Au}_2\text{S}_3$  staple in  $[\text{Au}_{25}(\text{SC}_3\text{H}_7)_{18}]^{1-}$  outlined by the red, blue, and yellow circles. The S-C connection in red is directionally opposite from the S-C in blue, creating a trans configuration. The S-C connection in yellow is directionally the same as the one in blue, creating a cis configuration. Altogether, this forms an alternating trans/cis configuration across the staples. Further, the anti configuration of the propyl groups can be seen in the propyl group connected to sulfur atom 33.

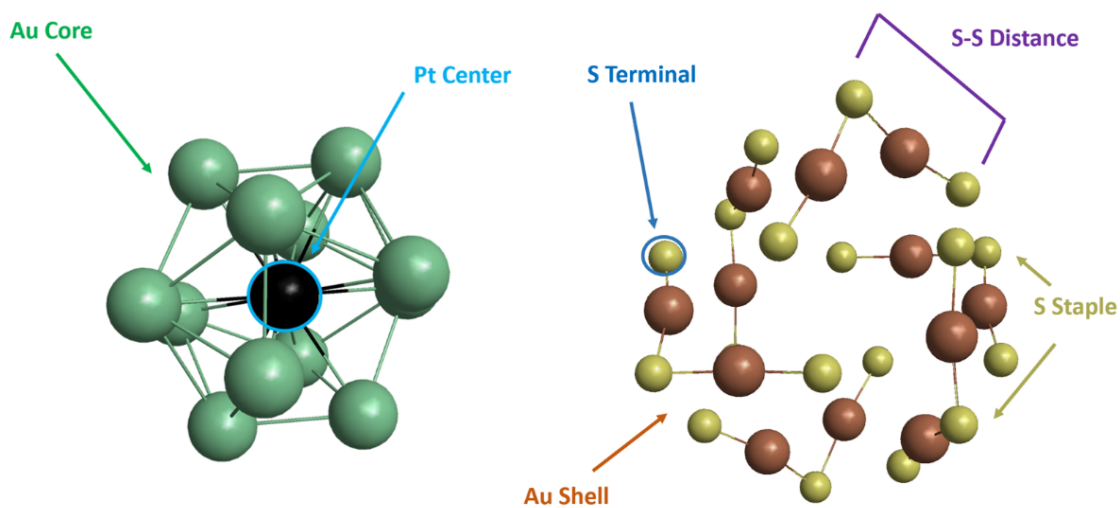

**Figure S3.** Atom labels for bond distance analysis shown in table 1.

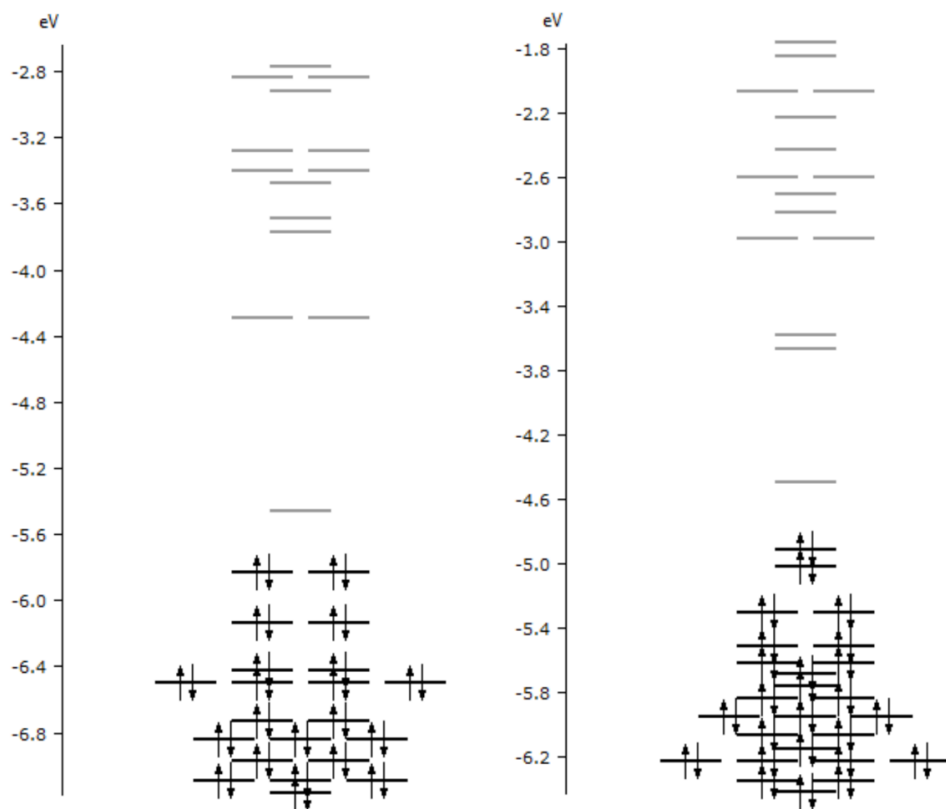

**Figure S4.** BP86/DZ molecular orbital diagram in eV for  $\text{Au}_{24}\text{Pt}(\text{SR})_{18}$  for  $\text{R} = \text{H}$  (left) and  $\text{R} = \text{C}_3\text{H}_7$  (right).

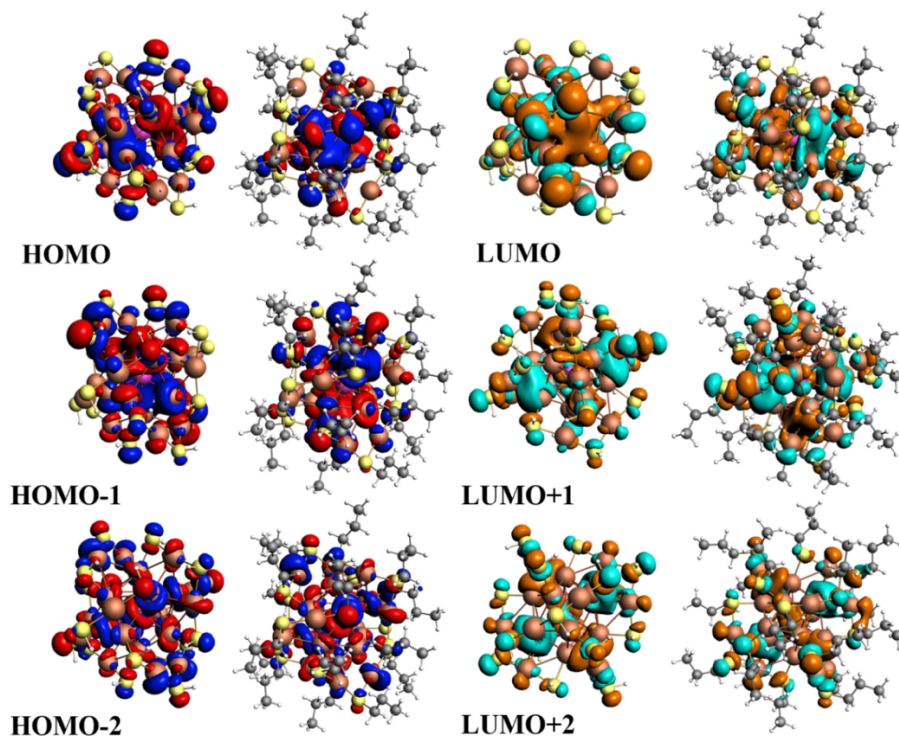

**Figure S5.** Images of the first six frontier MOs (H-2 through L+2) for  $\text{Au}_{24}\text{Pt}(\text{SR})_{18}$  for  $\text{R} = \text{H}$  (left), and  $\text{R} = \text{C}_3\text{H}_7$  (right).

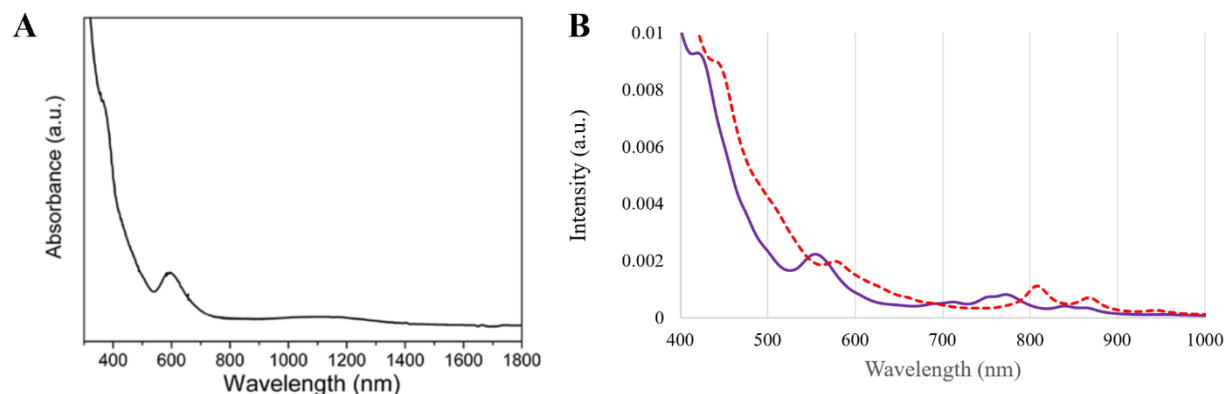

**Figure S6.** Absorption spectrum of Au<sub>24</sub>Pt(SR)<sub>18</sub> clusters. (A) Experimental results reprinted with permission from JACS 2008, 130, 5883-5885. Copyright 2008 American Chemical Society. (B) Theoretical spectrum calculated with TDDFT+TB\* at the BP86/DZ level of theory for R=H (solid purple) and R=C<sub>3</sub>H<sub>7</sub> (dotted red).

\*Note: The hydrogen results completed with TDDFT only included 100 vertical excitations. To achieve higher energy ranges at a cheaper computational cost, time-dependent density-functional theory plus tight binding (TDDFT+TB) (Ref. 1) was used to calculate the first 1500 vertical excitation energies. These energies were then fit with a 30 nm FWHM.

**Table S2.** Absorption details (state, energy, transition type) of  $\text{Au}_{24}\text{Pt}(\text{SR})_{18}$  when  $\text{R} = \text{H}$  (left), and  $\text{R} = \text{C}_3\text{H}_7$  (right)

| <b><math>\text{PtAu}_{24}(\text{SH})_{18}^0</math> TDDFT</b> |             |                   | <b><math>\text{PtAu}_{24}(\text{SC}_3\text{H}_7)_{18}^0</math> TDDFT</b> |             |                   |     |
|--------------------------------------------------------------|-------------|-------------------|--------------------------------------------------------------------------|-------------|-------------------|-----|
| State                                                        | Energy (eV) | Major transitions | State                                                                    | Energy (eV) | Major transitions |     |
| S <sub>1</sub>                                               | 0.423       | P→P               | S <sub>1</sub>                                                           | 0.473       | P→P               |     |
| S <sub>2</sub>                                               | 0.454       |                   | S <sub>2</sub>                                                           | 0.585       |                   |     |
| S <sub>3</sub>                                               | 0.739       | d→P               | S <sub>3</sub>                                                           | 0.875       | d→P               |     |
| S <sub>4</sub>                                               | 0.796       |                   | S <sub>4</sub>                                                           | 0.941       |                   |     |
| S <sub>5</sub>                                               | 1.000       |                   | S <sub>5</sub>                                                           | 1.087       |                   |     |
| S <sub>6</sub>                                               | 1.023       |                   | S <sub>6</sub>                                                           | 1.131       |                   |     |
| S <sub>7</sub>                                               | 1.081       |                   | S <sub>7</sub>                                                           | 1.157       |                   |     |
| S <sub>8</sub>                                               | 1.088       |                   | S <sub>8</sub>                                                           | 1.205       |                   |     |
| S <sub>9</sub>                                               | 1.095       |                   | S <sub>9</sub>                                                           | 1.232       |                   |     |
| S <sub>10</sub>                                              | 1.112       |                   | S <sub>10</sub>                                                          | 1.297       |                   |     |
| S <sub>11</sub>                                              | 1.318       |                   | S <sub>11</sub>                                                          | 1.326       |                   | P→D |
| S <sub>12</sub>                                              | 1.366       |                   | S <sub>12</sub>                                                          | 1.365       |                   |     |
| S <sub>13</sub>                                              | 1.446       | d→P               | S <sub>13</sub>                                                          | 1.407       | d→P               |     |
| S <sub>14</sub>                                              | 1.476       |                   | S <sub>14</sub>                                                          | 1.434       | P→D               |     |
| S <sub>15</sub>                                              | 1.494       |                   | S <sub>15</sub>                                                          | 1.455       | d→P               |     |
| S <sub>16</sub>                                              | 1.563       | P→D               | S <sub>16</sub>                                                          | 1.500       |                   |     |
| S <sub>17</sub>                                              | 1.578       | d→P               | S <sub>17</sub>                                                          | 1.543       | d→P and P→D mixed |     |
| S <sub>18</sub>                                              | 1.580       | d→P and P→D mixed | S <sub>18</sub>                                                          | 1.548       |                   |     |
| S <sub>19</sub>                                              | 1.598       |                   | S <sub>19</sub>                                                          | 1.551       | d→P               |     |
| S <sub>20</sub>                                              | 1.615       |                   | S <sub>20</sub>                                                          | 1.614       |                   |     |
| S <sub>21</sub>                                              | 1.661       | P→D               | S <sub>21</sub>                                                          | 1.654       |                   |     |

**Table S3.** Average bond distances (Å) and standard deviation of the core and shell atoms at the BP86/DZ S<sub>0</sub>, S<sub>3</sub>, S<sub>15</sub>, S<sub>18</sub> and S<sub>21</sub> minima.

| State           | Ligand              | Pt Center –<br>Au Core | Au Core –<br>Au Core | Au Core –<br>Au Shell | Au Core –<br>S Terminal | Au Shell –<br>S Staple | S-S<br>Distance |
|-----------------|---------------------|------------------------|----------------------|-----------------------|-------------------------|------------------------|-----------------|
| S <sub>0</sub>  | <b>R = Propyl</b>   | <b>2.853</b>           | <b>3.003</b>         | <b>3.133</b>          | <b>2.523</b>            | <b>2.424</b>           | <b>4.817</b>    |
|                 | SD                  | 0.054                  | 0.256                | 0.157                 | 0.030                   | 0.008                  | 0.009           |
| S <sub>3</sub>  | <b>R = Propyl</b>   | <b>2.822</b>           | <b>2.971</b>         | <b>3.112</b>          | <b>2.530</b>            | <b>2.427</b>           | <b>4.820</b>    |
|                 | SD                  | 0.029                  | 0.150                | 0.115                 | 0.019                   | 0.008                  | 0.011           |
| S <sub>19</sub> | <b>R = Propyl</b>   | <b>2.848</b>           | <b>2.999</b>         | <b>3.126</b>          | <b>2.528</b>            | <b>2.429</b>           | <b>4.819</b>    |
|                 | SD                  | 0.043                  | 0.221                | 0.165                 | 0.025                   | 0.011                  | 0.010           |
| S <sub>0</sub>  | <b>R = Hydrogen</b> | <b>2.827</b>           | <b>2.974</b>         | <b>3.115</b>          | <b>2.516</b>            | <b>2.422</b>           | <b>4.809</b>    |
|                 | SD                  | 0.016                  | 0.189                | 0.119                 | 0.023                   | 0.005                  | 0.006           |
| S <sub>15</sub> | <b>R = Hydrogen</b> | <b>2.816</b>           | <b>2.963</b>         | <b>3.109</b>          | <b>2.531</b>            | <b>2.425</b>           | <b>4.806</b>    |
|                 | SD                  | 0.017                  | 0.126                | 0.107                 | 0.008                   | 0.005                  | 0.005           |
| S <sub>18</sub> | <b>R = Hydrogen</b> | <b>2.808</b>           | <b>2.954</b>         | <b>3.095</b>          | <b>2.532</b>            | <b>2.430</b>           | <b>4.815</b>    |
|                 | SD                  | 0.015                  | 0.108                | 0.105                 | 0.006                   | 0.008                  | 0.009           |
| S <sub>21</sub> | <b>R = Hydrogen</b> | <b>2.830</b>           | <b>2.978</b>         | <b>3.116</b>          | <b>2.521</b>            | <b>2.426</b>           | <b>4.810</b>    |
|                 | SD                  | 0.014                  | 0.182                | 0.137                 | 0.015                   | 0.006                  | 0.006           |

### Reference

[1] R. Rüger, E. van Lenthe, T. Heine, L. Visscher. Tight-binding approximations to time-dependent density functional theory — A fast approach for the calculation of electronically excited states. *The Journal of Chemical Physics*. 2016, **144**, 184103.

**Coordinates in angstroms:**

**Au<sub>24</sub>Pt(SH)<sub>18</sub> S<sub>0</sub>**

|    |           |           |           |
|----|-----------|-----------|-----------|
| Pt | -0.002185 | 0.003993  | 0.003993  |
| Au | -2.121659 | 1.527578  | -1.075045 |
| Au | -2.536522 | -1.243027 | -0.255114 |
| Au | 0.057064  | -2.833653 | -0.242455 |
| Au | -0.779807 | -1.188514 | -2.410874 |
| Au | -3.656018 | -0.571270 | -3.008225 |
| Au | 2.033871  | -1.004752 | -1.692732 |
| Au | 1.621753  | -0.179875 | -4.557285 |
| Au | -2.362065 | -3.782819 | -2.015529 |
| Au | 1.011730  | 1.546944  | -2.118314 |
| Au | -3.997343 | -1.573559 | 2.478594  |
| Au | -2.932138 | 3.841441  | 0.819628  |
| Au | -1.157848 | 4.158157  | -2.250192 |
| Au | 2.122935  | -1.516934 | 1.075095  |
| Au | 2.532880  | 1.254078  | 0.256705  |
| Au | -0.059766 | 2.843583  | 0.251232  |
| Au | 0.780535  | 1.192017  | 2.418290  |
| Au | 3.658581  | 0.574059  | 3.006310  |
| Au | -2.035384 | 1.022397  | 1.695393  |
| Au | -1.629064 | 0.197242  | 4.561886  |
| Au | 2.359104  | 3.789011  | 2.018716  |
| Au | -1.028545 | -1.539520 | 2.121018  |
| Au | 3.987215  | 1.586659  | -2.472205 |
| Au | 2.920723  | -3.837924 | -0.806508 |
| Au | 1.147722  | -4.134646 | 2.267729  |
| S  | -3.871953 | 1.831066  | -2.825623 |
| S  | -0.958106 | -5.142738 | -0.580704 |
| S  | -2.674856 | 5.498743  | -0.930391 |
| S  | 0.345807  | 3.187048  | -3.871071 |
| S  | 3.619389  | 1.164837  | -4.824600 |
| S  | -0.384065 | -1.498873 | -4.856860 |
| S  | -3.954087 | -2.902172 | -3.613732 |
| S  | -4.860795 | -2.110453 | 0.279872  |
| S  | 3.660929  | -2.609508 | -2.770502 |
| S  | 3.883951  | -1.826773 | 2.814940  |
| S  | 0.951098  | 5.154018  | 0.591709  |
| S  | 2.644144  | -5.492572 | 0.943214  |
| S  | -0.342343 | -3.154532 | 3.893022  |
| S  | -3.635547 | -1.137241 | 4.828462  |
| S  | 0.388207  | 1.497341  | 4.865142  |
| S  | 3.961125  | 2.905439  | 3.605202  |
| S  | 4.859367  | 2.117278  | -0.274291 |
| S  | -3.657643 | 2.618772  | 2.795025  |
| H  | -3.032046 | 2.179841  | -3.881839 |

|   |           |           |           |
|---|-----------|-----------|-----------|
| H | -1.781436 | -5.107952 | 0.543297  |
| H | -3.844520 | 5.201044  | -1.628782 |
| H | -0.560976 | 2.372681  | -4.544938 |
| H | 2.971629  | 2.366297  | -5.113326 |
| H | 0.207397  | -2.759637 | -4.791901 |
| H | -3.126181 | -2.878920 | -4.735836 |
| H | -4.565167 | -3.472714 | 0.275165  |
| H | 2.785565  | -3.207564 | -3.675682 |
| H | 3.051228  | -2.185909 | 3.873514  |
| H | 1.774431  | 5.123803  | -0.532395 |
| H | 3.820693  | -5.213748 | 1.638038  |
| H | 0.565948  | -2.326250 | 4.547595  |
| H | -2.994039 | -2.339165 | 5.128994  |
| H | -0.190306 | 2.764186  | 4.803841  |
| H | 3.144894  | 2.888211  | 4.735817  |
| H | 4.568639  | 3.480513  | -0.267318 |
| H | -2.772629 | 3.217657  | 3.690208  |

**Au<sub>24</sub>Pt(SC<sub>3</sub>H<sub>7</sub>)<sub>18</sub> S<sub>0</sub>**

|    |           |           |           |
|----|-----------|-----------|-----------|
| Pt | -0.053679 | -0.006859 | -0.182174 |
| Au | -1.892125 | 1.649316  | -1.596362 |
| Au | -2.531068 | -1.300742 | -0.539691 |
| Au | -0.110181 | -2.807606 | -0.623852 |
| Au | -0.912940 | -0.846609 | -2.801564 |
| Au | -4.035386 | -0.550192 | -2.982782 |
| Au | 1.832322  | -1.055146 | -1.968961 |
| Au | 1.504130  | -0.471998 | -4.906116 |
| Au | -2.318773 | -3.483774 | -2.785123 |
| Au | 0.808355  | 1.483050  | -2.465084 |
| Au | -4.174445 | -1.015267 | 2.310488  |
| Au | -3.024566 | 3.894895  | 0.078691  |
| Au | -0.551589 | 4.397482  | -2.362764 |
| Au | 1.433881  | -1.808113 | 1.493940  |
| Au | 2.249244  | 1.664802  | 0.009306  |
| Au | -0.260904 | 2.883198  | 0.281999  |
| Au | 0.737673  | 0.924125  | 2.294980  |
| Au | 3.779592  | 0.742232  | 2.354535  |
| Au | -2.088493 | 1.024996  | 1.471048  |
| Au | -1.634977 | 0.308569  | 4.406045  |
| Au | 2.058472  | 3.727593  | 2.250787  |
| Au | -1.254772 | -1.554744 | 2.027238  |
| Au | 3.780629  | 1.125664  | -3.010792 |
| Au | 2.602691  | -3.975651 | -0.190633 |
| Au | 0.031477  | -4.483805 | 1.952955  |
| S  | -3.997100 | 1.867143  | -2.911577 |
| S  | -0.161879 | -4.547265 | -2.512087 |



|   |           |           |           |
|---|-----------|-----------|-----------|
| S | -2.232664 | 5.752257  | -1.258717 |
| S | 1.257239  | 3.586182  | -3.762600 |
| S | 3.927936  | -0.483727 | -4.826803 |
| S | -0.868980 | -0.684589 | -5.348418 |
| S | -4.632193 | -2.900712 | -3.205532 |
| S | -4.829003 | -1.983806 | 0.203598  |
| S | 3.893869  | -2.339444 | -1.406163 |
| S | 3.744196  | -1.677121 | 2.412511  |
| S | -0.105273 | 4.777111  | 2.006955  |
| S | 1.540816  | -5.951483 | 0.725099  |
| S | -1.528082 | -3.565331 | 3.586958  |
| S | -4.041130 | 0.006282  | 4.508360  |
| S | 0.718230  | 0.763700  | 4.816727  |
| S | 4.374576  | 3.097353  | 2.547757  |
| S | 4.094944  | 2.775010  | -1.272002 |
| S | -4.173073 | 2.403163  | 1.585944  |
| C | -3.367547 | 2.225897  | -4.711977 |
| C | -0.677693 | -6.340802 | -1.995036 |
| C | 0.393376  | 3.347481  | -5.475506 |
| C | 4.546092  | 0.509919  | -6.363936 |
| C | -0.944692 | -2.479557 | -6.066831 |
| C | -4.861209 | -3.252335 | -5.107404 |
| C | -4.605981 | -3.879813 | 0.539724  |
| C | 4.363665  | -3.456173 | -2.924305 |
| C | 3.507518  | -1.910771 | 4.325705  |
| C | 0.371152  | 6.427017  | 1.110852  |
| C | 2.737356  | -6.657023 | 2.066053  |
| C | -0.264749 | -3.293187 | 5.041096  |
| C | -4.331503 | -1.495284 | 5.689571  |
| C | 0.668465  | 2.550037  | 5.554308  |
| C | 4.736871  | 3.364552  | 4.429594  |
| C | 5.868925  | 2.322333  | -0.639143 |
| C | -4.015676 | 3.430860  | 3.223122  |
| C | -4.927693 | 6.408129  | -1.945403 |
| C | -6.034044 | 6.605489  | -3.004073 |
| C | -4.821682 | 4.726628  | 3.133361  |
| C | -4.772855 | 5.503481  | 4.466206  |
| C | -6.342795 | -3.448261 | -5.439536 |
| C | -7.200623 | -2.183058 | -5.265459 |
| C | -5.817706 | -1.852202 | 5.732617  |
| C | -5.576769 | -4.372424 | 1.612107  |
| C | -6.076240 | -3.048989 | 6.673712  |
| C | -5.443292 | -5.895505 | 1.827973  |
| C | -0.956942 | -2.743505 | 6.286185  |
| C | 3.235774  | -5.636909 | 3.083268  |
| C | 0.049249  | -2.552638 | 7.441575  |

|   |           |           |           |
|---|-----------|-----------|-----------|
| C | 4.173910  | -6.293005 | 4.119229  |
| C | -0.176753 | -2.590050 | -7.383552 |
| C | 5.339350  | -4.550052 | -2.488744 |
| C | -0.267454 | -4.015907 | -7.968701 |
| C | 5.784168  | -5.414975 | -3.687699 |
| C | -0.037452 | 2.573403  | 6.909348  |
| C | 4.665732  | 4.850498  | 4.784136  |
| C | -0.020672 | 3.987641  | 7.527750  |
| C | 5.060680  | 5.101877  | 6.255275  |
| C | 1.262820  | 7.310041  | 1.983743  |
| C | 1.565261  | 8.654052  | 1.285643  |
| C | 6.121115  | 0.835234  | -0.423532 |
| C | 7.562254  | 0.575899  | 0.064849  |
| C | 3.799760  | 1.811616  | -6.627068 |
| C | 0.418631  | 4.648003  | -6.279135 |
| C | -4.375594 | 1.781827  | -5.772538 |
| C | -0.209587 | 4.455982  | -7.676479 |
| C | -5.726776 | 2.514487  | -5.721069 |
| C | 4.713889  | -1.399297 | 5.117559  |
| C | 6.033478  | -2.135318 | 4.828327  |
| C | -1.767029 | -6.421741 | -0.928870 |
| C | -2.055863 | -7.887301 | -0.538033 |
| H | 2.162703  | -7.461678 | 2.547082  |
| H | 2.364871  | -5.187401 | 3.590051  |
| H | 3.761271  | -4.825246 | 2.554086  |
| H | 3.662050  | -7.103651 | 4.662760  |
| H | 5.066635  | -6.717250 | 3.632536  |
| H | 4.515111  | -5.554315 | 4.860007  |
| H | 0.177624  | -4.280699 | 5.231868  |
| H | 0.505724  | -2.605825 | 4.674867  |
| H | -1.762600 | -3.427832 | 6.600986  |
| H | -1.412312 | -1.767104 | 6.040896  |
| H | 0.531844  | -3.506292 | 7.711892  |
| H | 0.832836  | -1.832533 | 7.159322  |
| H | -0.460465 | -2.164390 | 8.337229  |
| H | -5.262820 | 5.680137  | -1.187884 |
| H | -4.735475 | 7.361122  | -1.424717 |
| H | -6.960359 | 6.964216  | -2.529383 |
| H | -6.262089 | 5.657949  | -3.516578 |
| H | -5.732120 | 7.345705  | -3.762463 |
| C | -3.635004 | 5.900963  | -2.585088 |
| H | -3.772641 | 4.909077  | -3.030071 |
| H | -3.244535 | 6.601842  | -3.337089 |
| H | -2.949288 | 3.624753  | 3.390143  |
| H | -4.400891 | 2.764289  | 4.005926  |
| H | -4.412876 | 5.350993  | 2.321172  |

|   |           |           |           |
|---|-----------|-----------|-----------|
| H | -5.199104 | 4.906734  | 5.288313  |
| H | -5.350003 | 6.438148  | 4.389649  |
| H | -3.736060 | 5.763654  | 4.731334  |
| H | -5.868837 | 4.496632  | 2.874463  |
| H | 1.010970  | 4.335501  | 7.696264  |
| H | -0.521424 | 4.712575  | 6.867159  |
| H | -0.542814 | 3.992474  | 8.497091  |
| H | 0.449392  | 1.859745  | 7.594788  |
| H | -1.079457 | 2.236583  | 6.776652  |
| H | 1.724236  | 2.842821  | 5.641431  |
| H | 0.177988  | 3.200849  | 4.821518  |
| H | -6.162043 | -2.098971 | 4.714669  |
| H | -3.960274 | -1.173004 | 6.672495  |
| H | -5.763518 | -2.818945 | 7.705051  |
| H | -3.723939 | -2.326747 | 5.313688  |
| H | -6.400802 | -0.979249 | 6.070201  |
| H | -5.524460 | -3.941467 | 6.338742  |
| H | -7.148164 | -3.299112 | 6.692787  |
| H | 2.597765  | -1.367400 | 4.605261  |
| H | 6.333307  | -2.014183 | 3.776748  |
| H | 5.937195  | -3.213471 | 5.034319  |
| H | 6.844301  | -1.741144 | 5.460831  |
| H | 4.835895  | -0.319452 | 4.922133  |
| H | 4.459796  | -1.504412 | 6.189745  |
| H | 3.359603  | -2.991300 | 4.460263  |
| H | 4.920907  | -5.913183 | -4.156424 |
| H | 6.490671  | -6.193500 | -3.359980 |
| H | 6.284565  | -4.802786 | -4.454803 |
| H | 6.221929  | -4.090331 | -2.013541 |
| H | 4.855624  | -5.187408 | -1.728920 |
| H | 4.816230  | -2.768969 | -3.649128 |
| H | 3.434693  | -3.868489 | -3.336681 |
| C | 4.382324  | 2.558013  | -7.846111 |
| H | 3.853627  | 2.450260  | -5.729624 |
| H | 2.737120  | 1.578218  | -6.802368 |
| H | 5.611643  | 0.686457  | -6.157824 |
| H | 4.449384  | -0.192910 | -7.204087 |
| H | 3.833487  | 3.494987  | -8.024732 |
| H | 5.441516  | 2.813829  | -7.683589 |
| H | 4.313894  | 1.944206  | -8.758625 |
| H | 0.959863  | 2.547486  | -5.970168 |
| H | -0.628216 | 2.996591  | -5.297872 |
| H | -0.128524 | 5.430651  | -5.727314 |
| H | 1.459083  | 4.997728  | -6.382944 |
| H | -0.180524 | 5.396651  | -8.248019 |
| H | 0.332916  | 3.690002  | -8.253223 |

|   |           |           |           |
|---|-----------|-----------|-----------|
| H | -1.261295 | 4.138098  | -7.597570 |
| H | -0.572251 | -1.859978 | -8.109368 |
| H | 0.879933  | -2.329040 | -7.202574 |
| H | -1.312662 | -4.293881 | -8.180070 |
| H | 0.298616  | -4.084534 | -8.910640 |
| H | 0.148244  | -4.755941 | -7.266728 |
| H | -0.547601 | -3.159060 | -5.303638 |
| H | -2.016906 | -2.677796 | -6.203988 |
| H | -4.427938 | -2.403802 | -5.650264 |
| H | -4.281043 | -4.162051 | -5.307124 |
| H | -6.393927 | -3.786704 | -6.491968 |
| H | -6.750469 | -4.268153 | -4.823614 |
| H | -8.242506 | -2.377745 | -5.564412 |
| H | -7.205580 | -1.845751 | -4.218571 |
| H | -6.815699 | -1.359865 | -5.888013 |
| H | -1.450297 | -5.856457 | -0.035059 |
| H | -2.850763 | -7.936040 | 0.222005  |
| H | -2.382282 | -8.476118 | -1.410970 |
| H | -2.684210 | -5.942060 | -1.311532 |
| H | 0.256315  | -6.806352 | -1.652329 |
| H | -1.155838 | -8.364281 | -0.118077 |
| H | -1.000319 | -6.813933 | -2.934721 |
| H | -4.424205 | -6.156521 | 2.153225  |
| H | -6.146181 | -6.238901 | 2.603314  |
| H | -5.664043 | -6.448303 | 0.900993  |
| H | -3.561222 | -4.045265 | 0.825239  |
| H | -4.800403 | -4.348902 | -0.434608 |
| H | -6.611046 | -4.124187 | 1.320500  |
| H | -5.366923 | -3.844076 | 2.556864  |
| H | 4.017243  | 2.768039  | 5.002396  |
| H | 5.747942  | 2.957913  | 4.577793  |
| H | 3.641978  | 5.217113  | 4.600999  |
| H | 4.994664  | 6.174737  | 6.494034  |
| H | 6.094426  | 4.773872  | 6.450030  |
| H | 4.394560  | 4.559419  | 6.944526  |
| H | 6.531755  | 2.738124  | -1.413100 |
| H | 5.404020  | 0.448758  | 0.322904  |
| H | 5.932837  | 0.286307  | -1.361679 |
| H | 7.725040  | -0.501984 | 0.218157  |
| H | 8.303116  | 0.933070  | -0.669396 |
| H | 5.986721  | 2.895296  | 0.290008  |
| H | 7.752601  | 1.088742  | 1.021445  |
| H | -3.193824 | 3.311404  | -4.741134 |
| H | -2.420013 | 1.689783  | -4.826855 |
| H | -3.900194 | 1.949358  | -6.757636 |
| H | -4.531814 | 0.693703  | -5.675031 |

|   |           |           |           |
|---|-----------|-----------|-----------|
| H | -5.587549 | 3.603036  | -5.823146 |
| H | -6.246858 | 2.321138  | -4.771137 |
| H | -6.381457 | 2.179745  | -6.540689 |
| H | 0.858701  | 6.161882  | 0.165181  |
| H | -0.593474 | 6.908605  | 0.900012  |
| H | 2.205591  | 6.776825  | 2.193229  |
| H | 0.768697  | 7.494504  | 2.952721  |
| H | 2.079749  | 8.491132  | 0.325446  |
| H | 2.212828  | 9.282352  | 1.917147  |
| H | 0.637693  | 9.213920  | 1.085589  |
| H | 5.336903  | 5.419447  | 4.119228  |
| H | 3.566117  | -7.095243 | 1.491855  |

**[Au<sub>25</sub>(SR)<sub>18</sub>]<sup>1-</sup> S<sub>0</sub>**

|    |           |           |           |
|----|-----------|-----------|-----------|
| Au | -0.001750 | 0.000369  | 0.000873  |
| Au | -1.956746 | 1.594127  | -1.339858 |
| Au | -2.501313 | -1.294245 | -0.287945 |
| Au | 0.133856  | -2.777692 | -0.453851 |
| Au | -0.876677 | -0.854626 | -2.539268 |
| Au | -4.124330 | -0.618068 | -2.666525 |
| Au | 2.111891  | -0.947917 | -1.634859 |
| Au | 1.441709  | -0.249151 | -4.560292 |
| Au | -2.207419 | -3.563853 | -2.390662 |
| Au | 0.910446  | 1.546642  | -2.172735 |
| Au | -4.010829 | -1.181852 | 2.568898  |
| Au | -3.072519 | 3.769949  | 0.378956  |
| Au | -0.581623 | 4.259546  | -2.137824 |
| Au | 1.953263  | -1.593096 | 1.341389  |
| Au | 2.498353  | 1.295345  | 0.287352  |
| Au | -0.137786 | 2.779121  | 0.454221  |
| Au | 0.873913  | 0.855264  | 2.539855  |
| Au | 4.121491  | 0.619286  | 2.664840  |
| Au | -2.115750 | 0.949049  | 1.635872  |
| Au | -1.443549 | 0.250354  | 4.559317  |
| Au | 2.206369  | 3.564050  | 2.390205  |
| Au | -0.913688 | -1.545462 | 2.174936  |
| Au | 4.006830  | 1.180700  | -2.572278 |
| Au | 3.065346  | -3.767766 | -0.377205 |
| Au | 0.573686  | -4.258784 | 2.136492  |
| S  | -4.091049 | 1.805953  | -2.692534 |
| S  | -0.068566 | -4.685161 | -2.128095 |
| S  | -2.292470 | 5.587261  | -1.026134 |
| S  | 1.245883  | 3.600394  | -3.627154 |
| S  | 3.836342  | 0.126091  | -4.755121 |
| S  | -0.885771 | -0.788318 | -5.070425 |
| S  | -4.534855 | -3.008971 | -2.813144 |

|   |           |           |           |
|---|-----------|-----------|-----------|
| S | -4.665591 | -2.333457 | 0.550703  |
| S | 4.211245  | -2.335626 | -1.954544 |
| S | 4.089498  | -1.804978 | 2.689436  |
| S | 0.065411  | 4.683066  | 2.131304  |
| S | 2.286421  | -5.586598 | 1.027274  |
| S | -1.251448 | -3.599527 | 3.628814  |
| S | -3.837528 | -0.131641 | 4.753924  |
| S | 0.882332  | 0.795761  | 5.071252  |
| S | 4.534370  | 3.009739  | 2.810193  |
| S | 4.661035  | 2.334414  | -0.554830 |
| S | -4.214279 | 2.338328  | 1.959103  |
| C | -3.556681 | 2.075884  | -4.529981 |
| C | -0.567796 | -6.298274 | -1.185245 |
| C | -3.700358 | 5.683560  | -2.347020 |
| C | 0.310991  | 3.195776  | -5.269293 |
| C | 3.975458  | 1.649477  | -5.935363 |
| C | -0.711454 | -2.612502 | -5.684113 |
| C | -4.744508 | -3.409455 | -4.694279 |
| C | -4.087894 | -4.142485 | 0.913204  |
| C | 3.992603  | -3.381493 | -3.567059 |
| C | 3.556115  | -2.076784 | 4.527010  |
| C | 0.560933  | 6.299324  | 1.192520  |
| C | 3.694111  | -5.677212 | 2.349063  |
| C | -0.311277 | -3.197209 | 5.268700  |
| C | -3.968663 | -1.657913 | 5.931394  |
| C | 0.703301  | 2.622274  | 5.676946  |
| C | 4.746699  | 3.414188  | 4.689937  |
| C | 4.080739  | 4.143051  | -0.915787 |
| C | -3.991369 | 3.383375  | 3.571688  |
| C | -4.680727 | 1.664976  | -5.484249 |
| C | -4.296133 | 1.895357  | -6.961385 |
| C | 4.682432  | -1.671340 | 5.480798  |
| C | 4.298369  | -1.903180 | 6.957812  |
| C | -1.154748 | -7.339554 | -2.138364 |
| H | -2.073290 | -6.937134 | -2.597591 |
| C | 1.137168  | 7.342432  | 2.150132  |
| H | 2.054400  | 6.943833  | 2.615285  |
| C | -4.994024 | 6.212291  | -1.725302 |
| C | -6.110950 | 6.341606  | -2.784755 |
| C | 4.990083  | -6.201448 | 1.728263  |
| C | 6.108153  | -6.322064 | 2.787570  |
| C | 0.114681  | 4.456558  | -6.113316 |
| H | -0.488415 | 5.183468  | -5.543583 |
| C | -0.121938 | -4.457768 | 6.114512  |
| H | 0.475863  | -5.189560 | 5.545491  |
| C | 5.433856  | 2.097963  | -6.047838 |

|   |           |           |           |
|---|-----------|-----------|-----------|
| C | 5.576608  | 3.329941  | -6.967722 |
| C | -5.425027 | -2.111591 | 6.049591  |
| C | -5.558300 | -3.345363 | 6.968664  |
| C | -0.005493 | -2.683108 | -7.038414 |
| C | 0.082810  | -4.136884 | -7.551936 |
| C | -0.008606 | 2.698775  | 7.027763  |
| C | -0.099785 | 4.155146  | 7.533411  |
| C | -6.212702 | -3.279029 | -5.105265 |
| C | -6.422430 | -3.684512 | -6.580358 |
| C | 6.211310  | 3.260672  | 5.106102  |
| C | 6.425144  | 3.677370  | 6.577543  |
| C | -4.902011 | -4.781918 | 2.038662  |
| C | -4.468971 | -6.244223 | 2.283863  |
| C | 4.897738  | 4.787141  | -2.036371 |
| C | 4.463007  | 6.249592  | -2.277503 |
| C | 4.856611  | -4.643013 | -3.515134 |
| C | 4.760149  | -5.449915 | -4.827864 |
| C | -4.858105 | 4.643350  | 3.524988  |
| C | -4.760068 | 5.448263  | 4.838857  |
| H | -2.652646 | 1.481346  | -4.705834 |
| H | -3.321519 | 3.147142  | -4.615142 |
| H | -5.599519 | 2.225624  | -5.242119 |
| H | -4.902457 | 0.596653  | -5.320860 |
| H | 3.317938  | -3.147511 | 4.610427  |
| H | 2.653937  | -1.480040 | 4.704919  |
| H | 5.599068  | -2.234745 | 5.236875  |
| H | 4.907755  | -0.603495 | 5.319246  |
| H | -1.272829 | -6.021919 | -0.392722 |
| H | 0.365433  | -6.653922 | -0.728157 |
| C | -1.469142 | -8.659502 | -1.399679 |
| H | -0.439330 | -7.532926 | -2.955643 |
| H | -0.371460 | 6.650574  | 0.730463  |
| H | 1.271932  | 6.027396  | 0.403823  |
| C | 1.451036  | 8.663855  | 1.413951  |
| H | 0.415520  | 7.532417  | 2.962710  |
| H | -3.839775 | 4.671251  | -2.743940 |
| H | -3.318152 | 6.351071  | -3.133359 |
| H | -4.808491 | 7.192958  | -1.255015 |
| H | -5.314483 | 5.519555  | -0.929469 |
| H | 3.313903  | -6.345205 | 3.135978  |
| H | 3.829859  | -4.663899 | 2.744767  |
| H | 4.809244  | -7.184305 | 1.260738  |
| H | 5.306872  | -5.509298 | 0.930430  |
| H | -0.643297 | 2.728395  | -5.004008 |
| H | 0.931846  | 2.446938  | -5.783214 |
| C | -0.579131 | 4.136345  | -7.455579 |

|   |           |           |           |
|---|-----------|-----------|-----------|
| H | 1.092965  | 4.929637  | -6.304363 |
| H | -0.926309 | -2.443378 | 5.782318  |
| H | 0.645559  | -2.736555 | 5.000846  |
| C | 0.575574  | -4.138735 | 7.455038  |
| H | -1.102862 | -4.924319 | 6.307972  |
| H | 3.344717  | 2.444416  | -5.518555 |
| H | 3.572664  | 1.318105  | -6.903452 |
| H | 5.813371  | 2.339120  | -5.041092 |
| H | 6.047671  | 1.267507  | -6.435840 |
| H | -3.563069 | -1.327415 | 6.898555  |
| H | -3.337296 | -2.450108 | 5.510224  |
| H | -5.808394 | -2.352883 | 5.044352  |
| H | -6.040041 | -1.283972 | 6.441736  |
| H | -1.741672 | -2.991487 | -5.742397 |
| H | -0.173576 | -3.175577 | -4.913249 |
| H | -0.544491 | -2.058977 | -7.771369 |
| H | 1.008263  | -2.260727 | -6.935497 |
| H | 0.168390  | 3.181592  | 4.901308  |
| H | 1.732881  | 3.002639  | 5.738057  |
| H | 0.527425  | 2.078491  | 7.766139  |
| H | -1.021751 | 2.275537  | 6.922380  |
| H | -4.381450 | -4.439831 | -4.816357 |
| H | -4.101679 | -2.723589 | -5.258411 |
| H | -6.832615 | -3.918080 | -4.454064 |
| H | -6.545892 | -2.239783 | -4.949579 |
| H | 4.090447  | 2.742630  | 5.255810  |
| H | 4.401076  | 4.451348  | 4.805706  |
| H | 6.844670  | 3.881357  | 4.450096  |
| H | 6.525350  | 2.213839  | 4.961747  |
| H | -3.019862 | -4.107733 | 1.156996  |
| H | -4.228157 | -4.668165 | -0.042709 |
| H | -5.975964 | -4.742386 | 1.788352  |
| H | -4.756962 | -4.193810 | 2.959914  |
| H | 4.216399  | 4.666920  | 0.041848  |
| H | 3.013714  | 4.106670  | -1.163543 |
| H | 5.970876  | 4.748567  | -1.782439 |
| H | 4.756858  | 4.202013  | -2.960182 |
| H | 4.301456  | -2.710735 | -4.380479 |
| H | 2.927660  | -3.622148 | -3.671448 |
| H | 4.529118  | -5.267341 | -2.666838 |
| H | 5.906860  | -4.362422 | -3.326432 |
| H | -2.926478 | 3.625940  | 3.672145  |
| H | -4.295753 | 2.711081  | 4.385517  |
| H | -4.534419 | 5.269906  | 2.676885  |
| H | -5.908275 | 4.360927  | 3.338689  |
| H | 1.863169  | 9.412045  | 2.110074  |



|   |           |           |           |
|---|-----------|-----------|-----------|
| H | 2.187930  | 8.500333  | 0.611525  |
| H | 0.540969  | 9.085500  | 0.957243  |
| H | -5.384587 | 6.354897  | 4.787435  |
| H | -5.101319 | 4.846589  | 5.696923  |
| H | -3.720883 | 5.759713  | 5.030503  |
| H | -6.610814 | -3.661992 | 7.041971  |
| H | -4.974557 | -4.192598 | 6.574865  |
| H | -5.197014 | -3.123846 | 7.986528  |
| H | 0.712315  | -5.054886 | 8.051930  |
| H | 1.566399  | -3.689840 | 7.285271  |
| H | -0.019207 | -3.427217 | 8.050550  |
| H | 6.320577  | -5.341889 | 3.243399  |
| H | 7.038704  | -6.690522 | 2.327388  |
| H | 5.823260  | -7.022530 | 3.590000  |
| H | 5.113063  | -1.577889 | 7.625514  |
| H | 3.393165  | -1.333211 | 7.219517  |
| H | 4.105453  | -2.969856 | 7.156136  |
| H | 5.820680  | 3.054864  | 7.256643  |
| H | 6.137857  | 4.730179  | 6.733519  |
| H | 7.482990  | 3.567054  | 6.864574  |
| H | 3.401339  | 6.296340  | -2.567110 |
| H | 5.057902  | 6.705251  | -3.085903 |
| H | 4.601393  | 6.858217  | -1.368860 |
| H | -1.567031 | 3.680068  | -7.288218 |
| H | -0.721618 | 5.053186  | -8.050029 |
| H | 0.021213  | 3.430671  | -8.052475 |
| H | -5.109254 | 1.566255  | -7.629119 |
| H | -4.106384 | 2.962285  | -7.161542 |
| H | -3.388976 | 1.327693  | -7.221322 |
| H | -5.831384 | -3.043813 | -7.254281 |
| H | -7.482875 | -3.591018 | -6.863652 |
| H | -6.115858 | -4.730084 | -6.747882 |
| H | -4.611735 | -6.856297 | 1.378215  |
| H | -3.406395 | -6.291707 | 2.569960  |
| H | -5.061600 | -6.695554 | 3.096370  |
| H | -0.622669 | 4.199461  | 8.502128  |
| H | -0.652678 | 4.783542  | 6.817452  |
| H | 0.903202  | 4.592866  | 7.665453  |
| H | -7.040107 | 6.712591  | -2.323824 |
| H | -6.327497 | 5.364019  | -3.244232 |
| H | -5.822493 | 7.043702  | -3.584533 |
| H | -2.199522 | -8.492749 | -0.592017 |
| H | -1.889496 | -9.406062 | -2.092615 |
| H | -0.557685 | -9.085088 | -0.949434 |
| H | 3.720860  | -5.760003 | -5.021169 |
| H | 5.383072  | -6.357467 | -4.773502 |

|   |           |           |           |
|---|-----------|-----------|-----------|
| H | 5.104190  | -4.850240 | -5.686208 |
| H | 5.220285  | 3.108491  | -7.987318 |
| H | 6.630670  | 3.642635  | -7.035454 |
| H | 4.993753  | 4.179774  | -6.578259 |
| H | -0.920958 | -4.573532 | -7.681443 |
| H | 0.638849  | -4.769233 | -6.841921 |
| H | 0.601008  | -4.176437 | -8.523368 |
